# Supplementary material
Source: ML conference proceedings conference paper supplement (https://openreview.net/forum?id=r2z5RPUsqe9)
Supplement: supplementary_material [file attachment]

$\bigcirc$  set of D data     $\bigcirc$  set of OOD data    — model trained with  $\times$ -labeled U     $\square$  model predictions  
 $\bullet$  labeled set S     $\times$   $\times$  artificially labeled U    — model trained with  $\times$ -labeled U

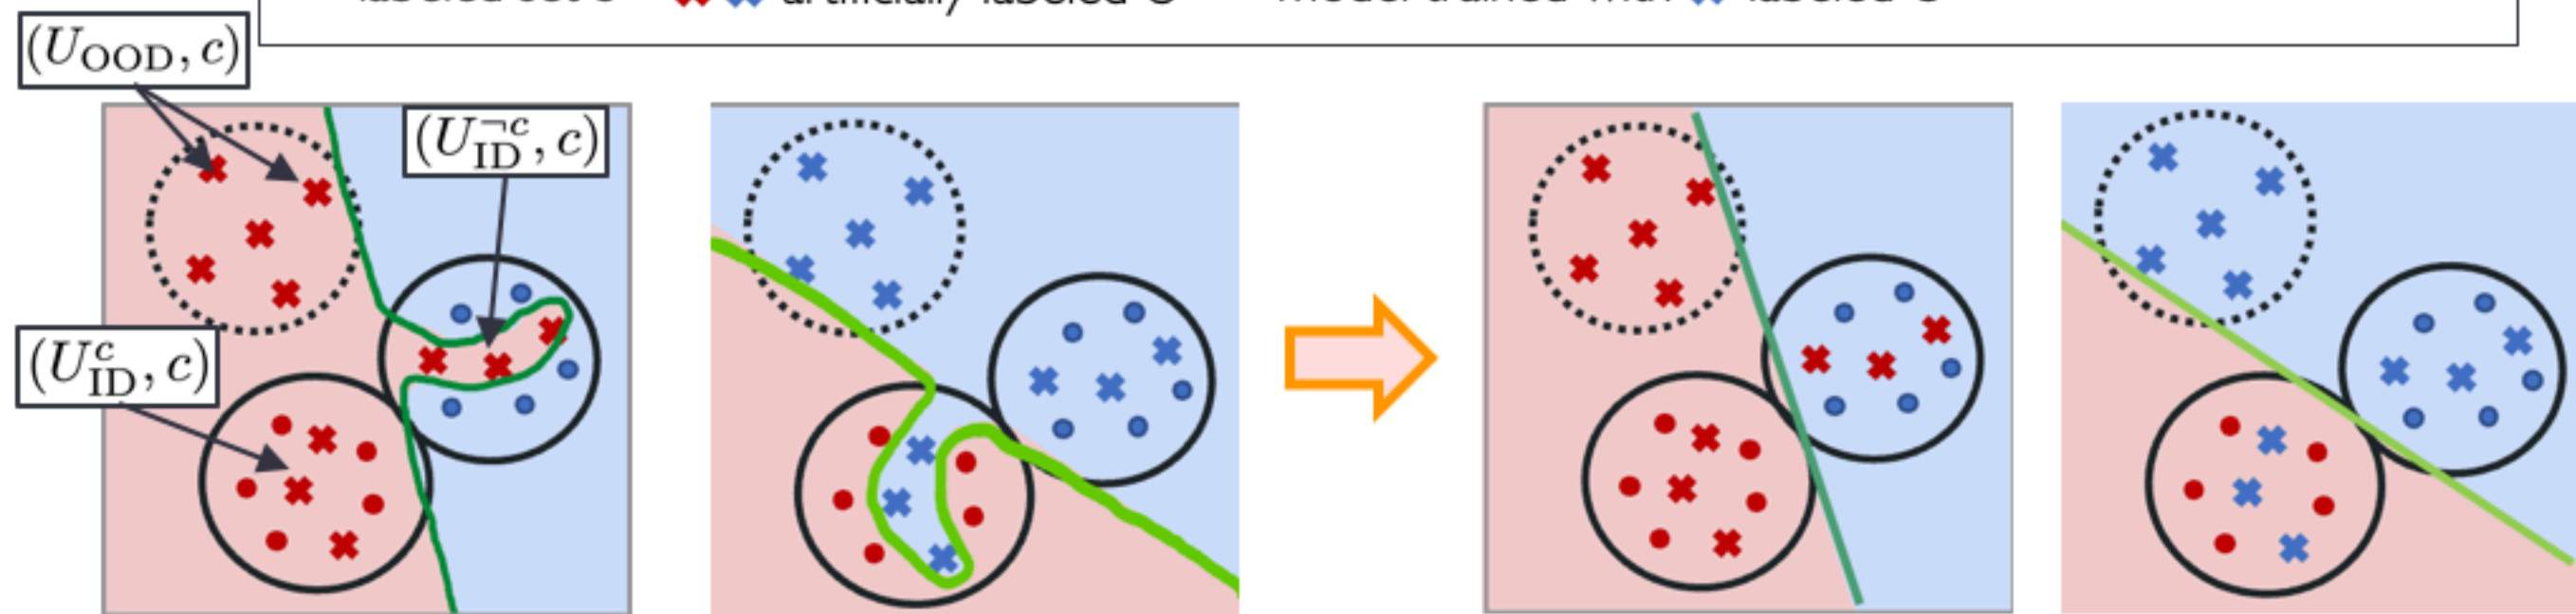

a) Two models trained to fit artificially labeled data

b) Effect of regularization on trained models
