# Supplementary material
Source: ML conference proceedings conference paper supplement (https://openreview.net/forum?id=r2z5RPUsqe9)
Supplement: supplementary_material [file attachment]

 : False positives / OOD

 : labeled ID

 : all OOD

$\equiv$  : OOD by  $\text{Avg}(T(f_i))$

$\subseteq$  : OOD by  $T(\text{Avg}(f_i))$

 : ensemble models

 : averaged model
