# Supplementary material
Source: ML conference proceedings conference paper supplement (https://openreview.net/forum?id=r2z5RPUsqe9)
Supplement: supplementary_material [file attachment]

 set of ID data   
  set of OOD data   
  model I   
  ensemble disagrees   
  model/ensemble prediction  
 labeled set S   
 unlabeled set U   
 model II   
 identified as OOD in U   
 predictions in U

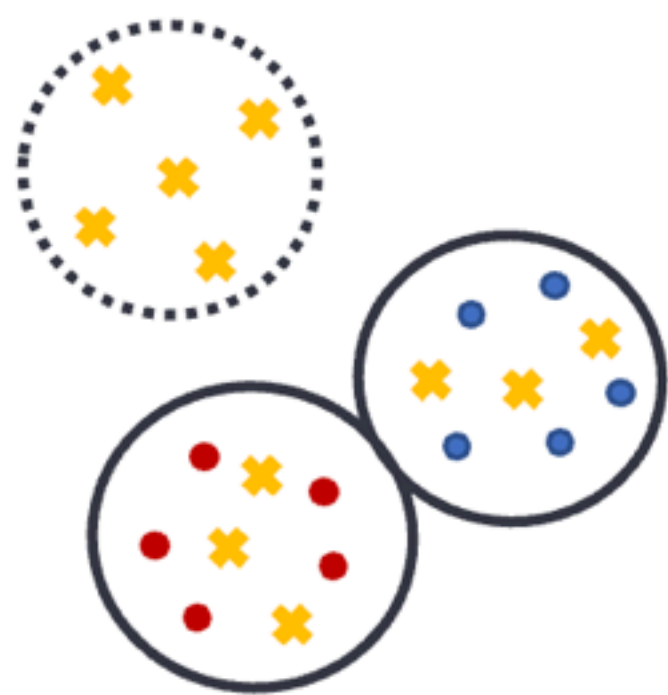

SSND setting

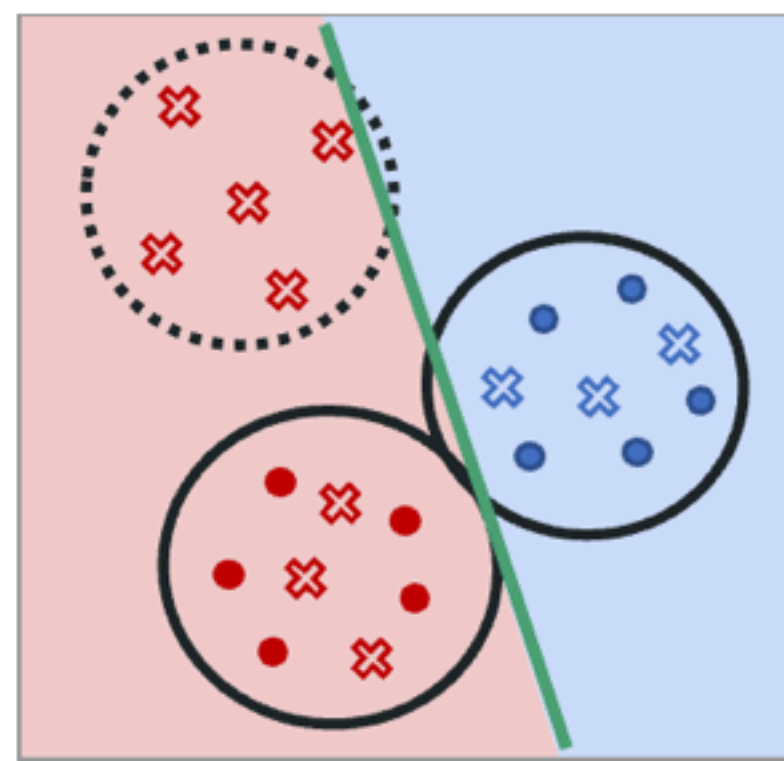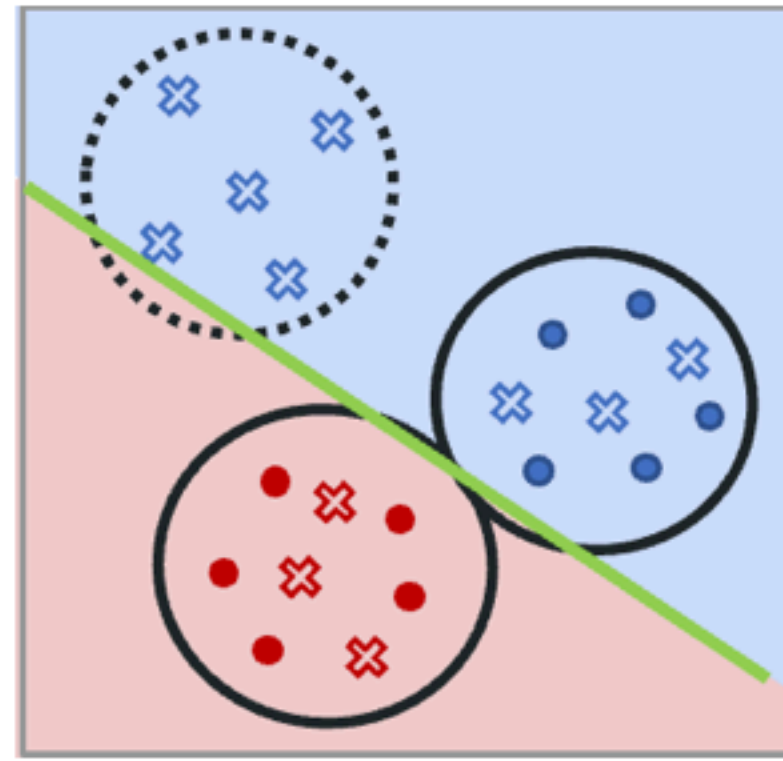

Individual models

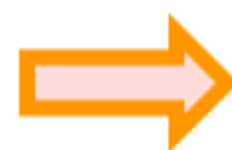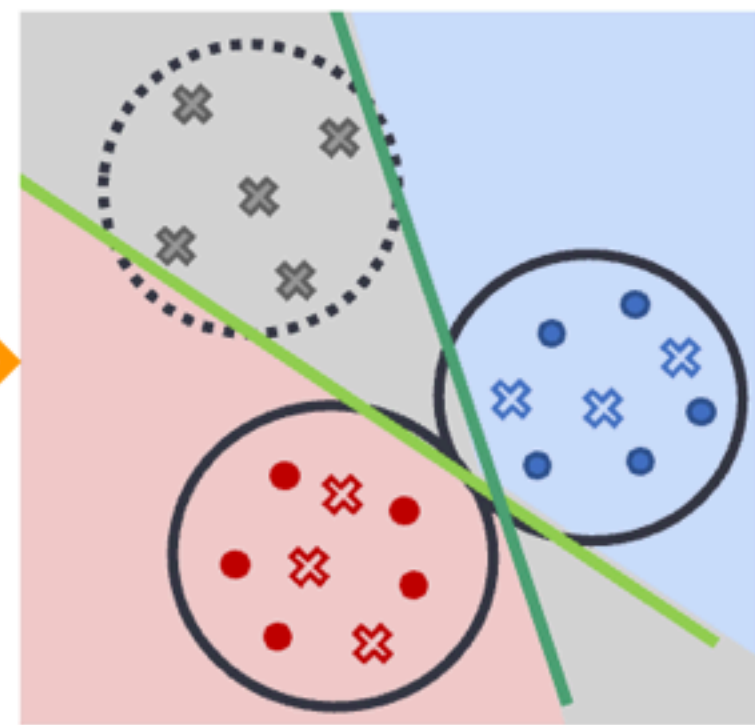

Ensemble predictions
