# Supplementary material
Source: ML conference proceedings conference paper supplement (https://openreview.net/forum?id=r2z5RPUsqe9)
Supplement: supplementary_material [file attachment]

All possible labelings on  
the test OOD set  $\mathcal{F}_\epsilon^*$

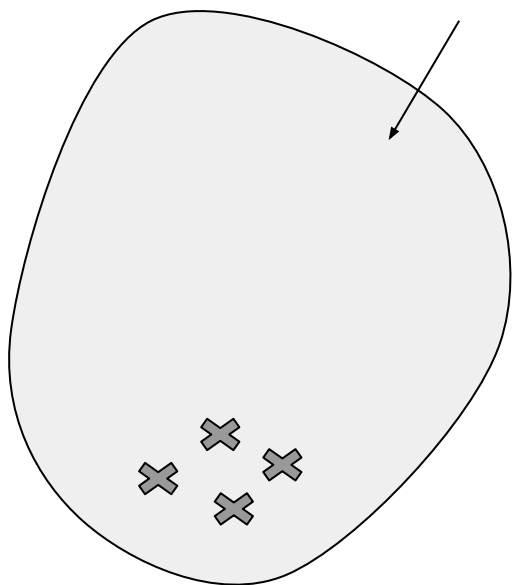

Models in vanilla ensemble

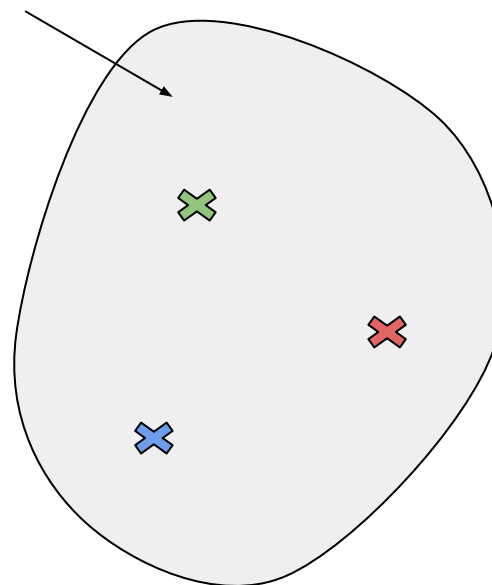

Models in RETO ensemble
