# Supplementary material
Source: ML conference proceedings conference paper supplement (https://openreview.net/forum?id=r2z5RPUsqe9)

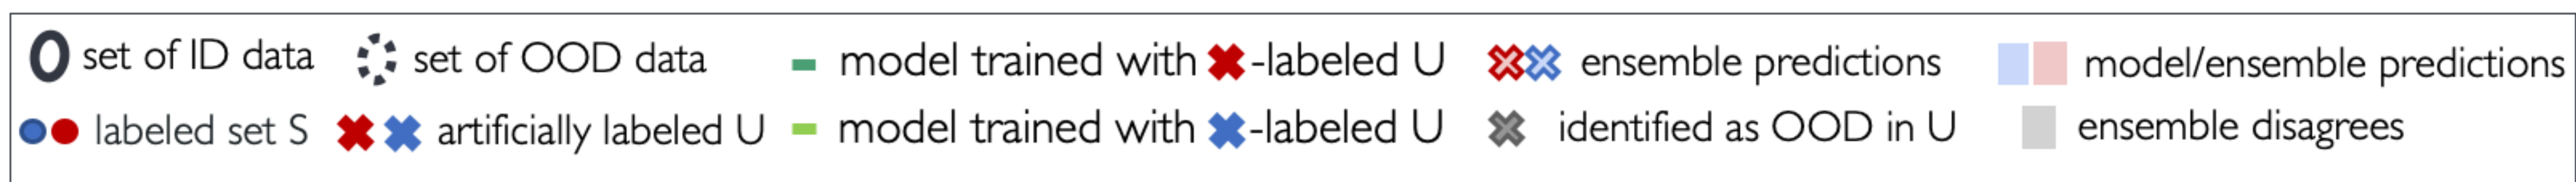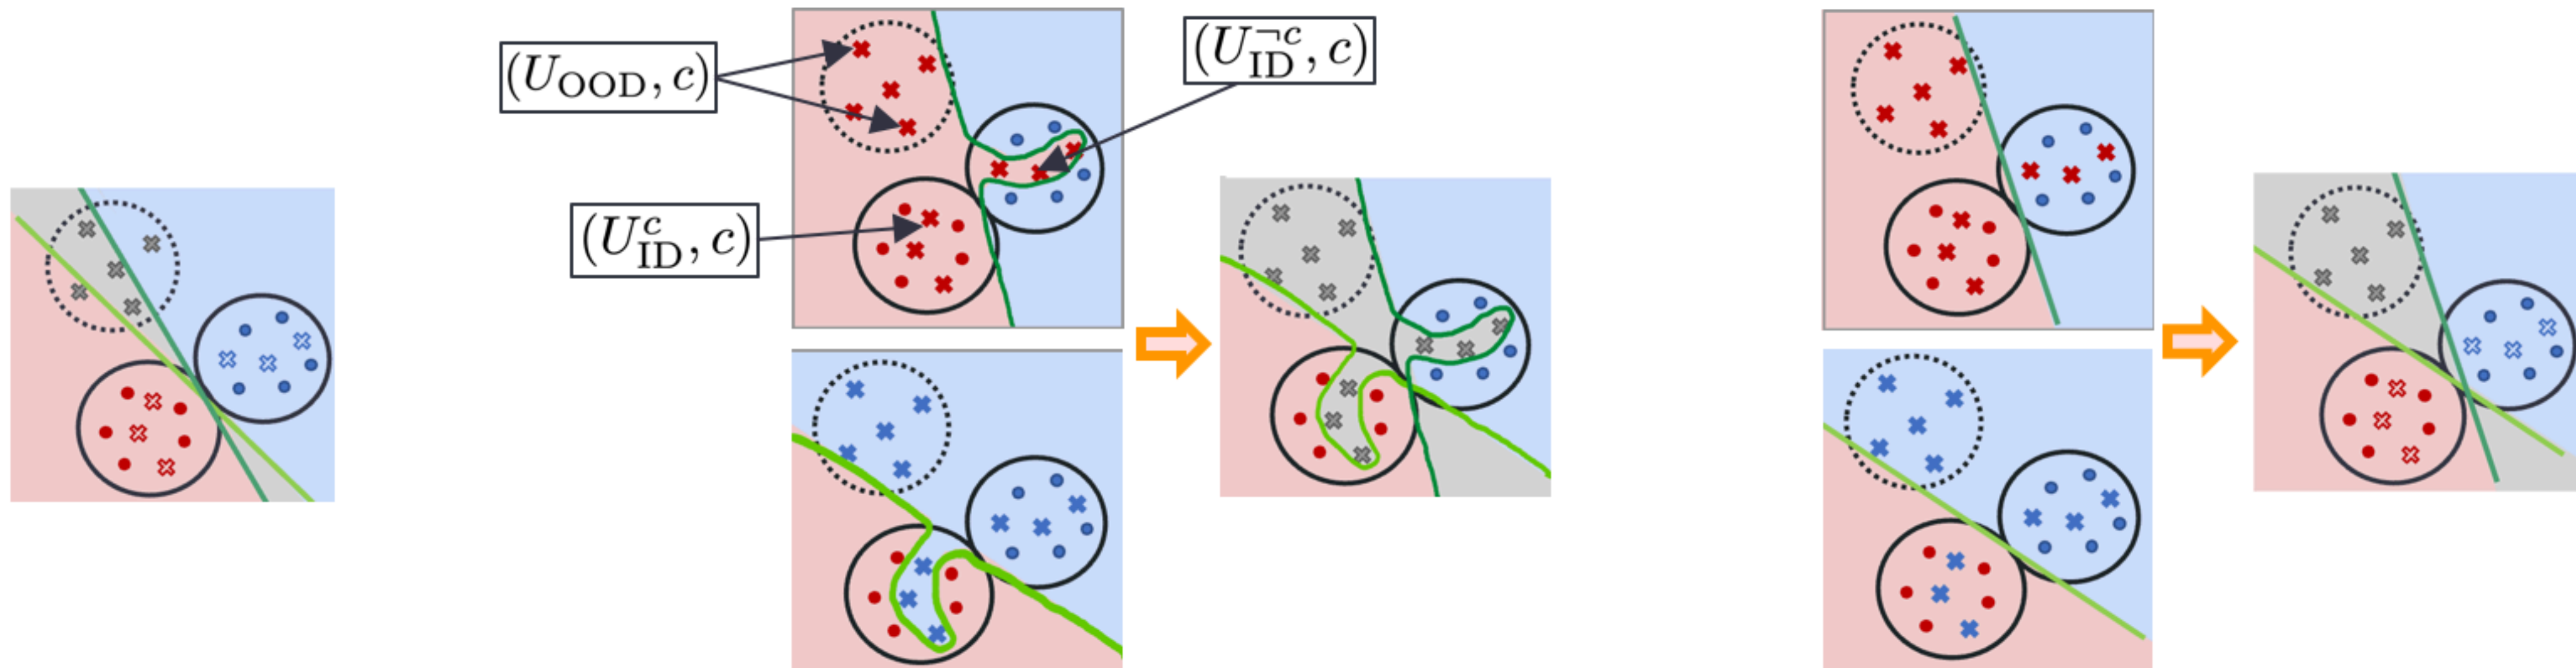

a) Too little disagreement

b) Too much disagreement

c) Right amount of disagreement

Supplement: supplementary_material [file attachment]

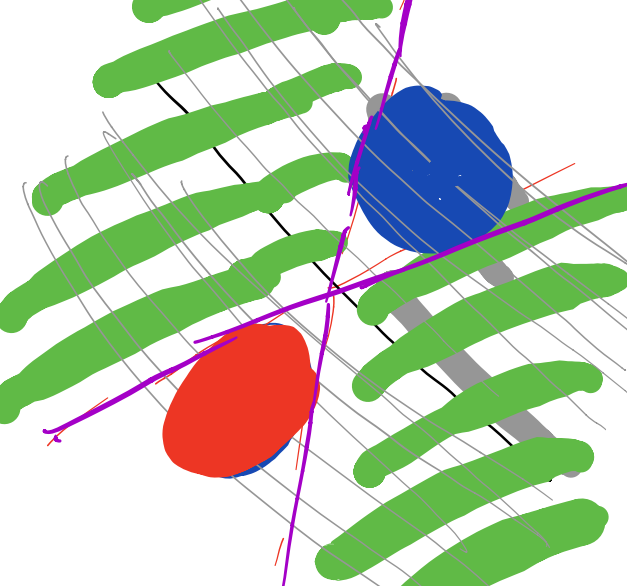

Supplement: supplementary_material [file attachment]

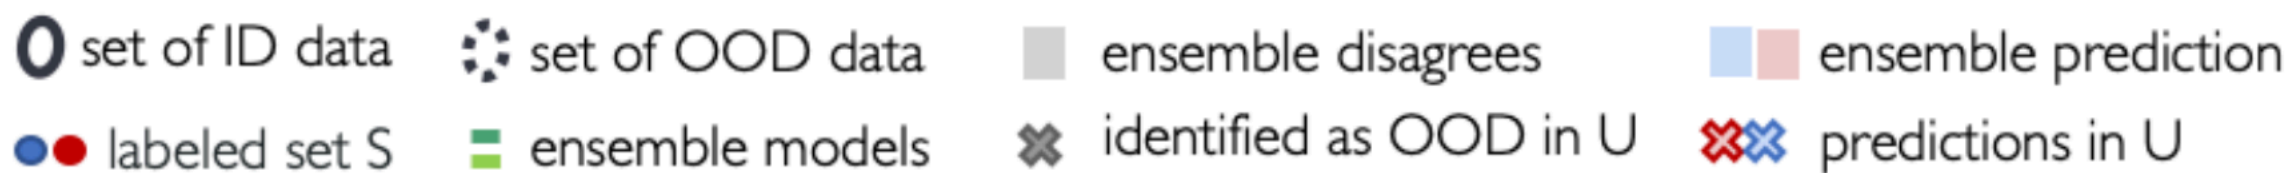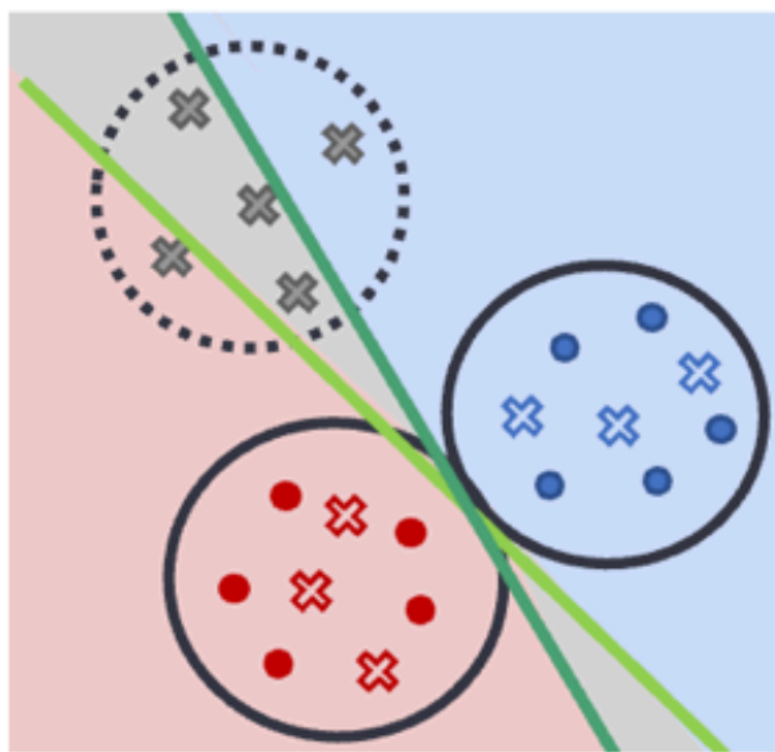

a) Too little disagreement

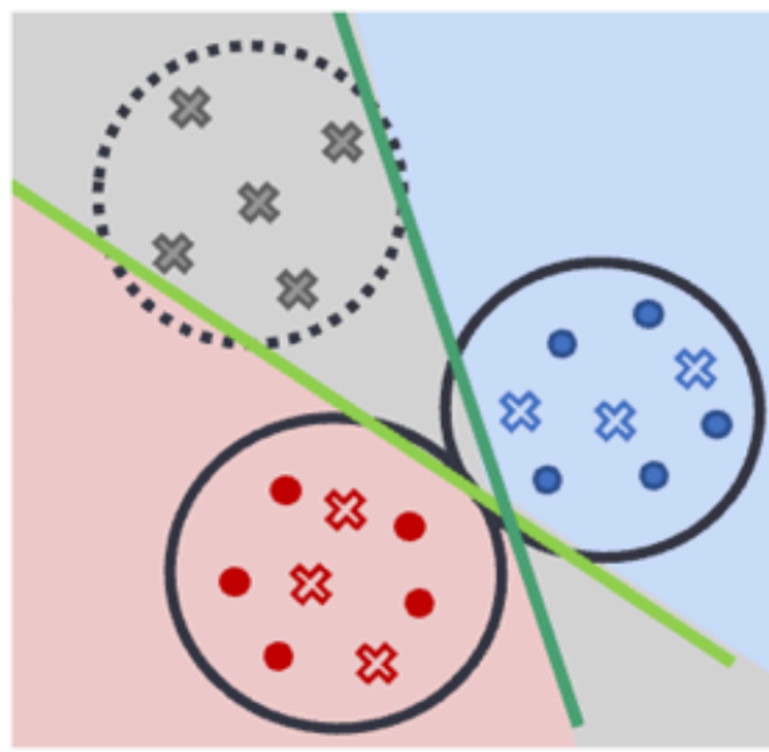

b) Just enough disagreement

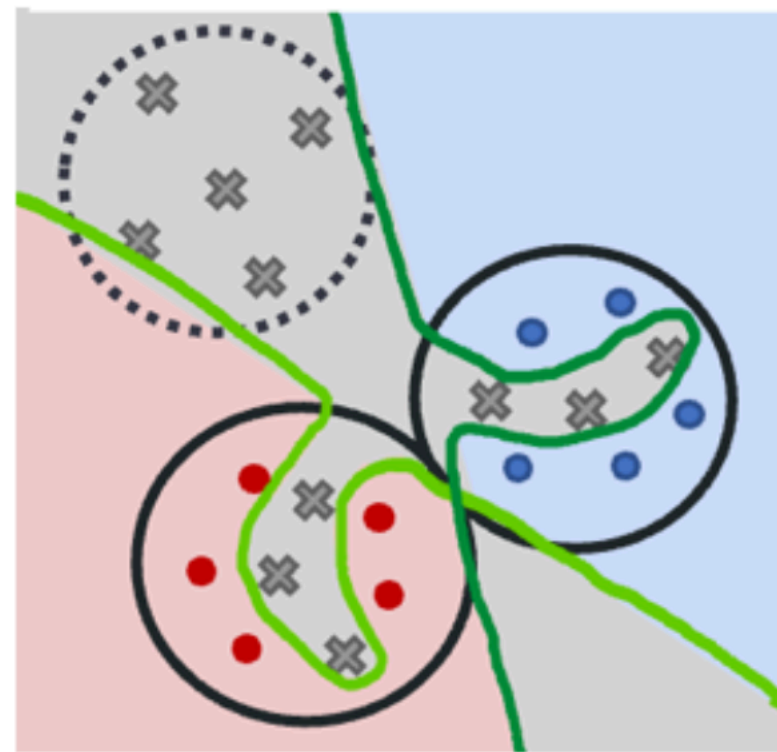

c) Too much disagreement

Supplement: supplementary_material [file attachment]

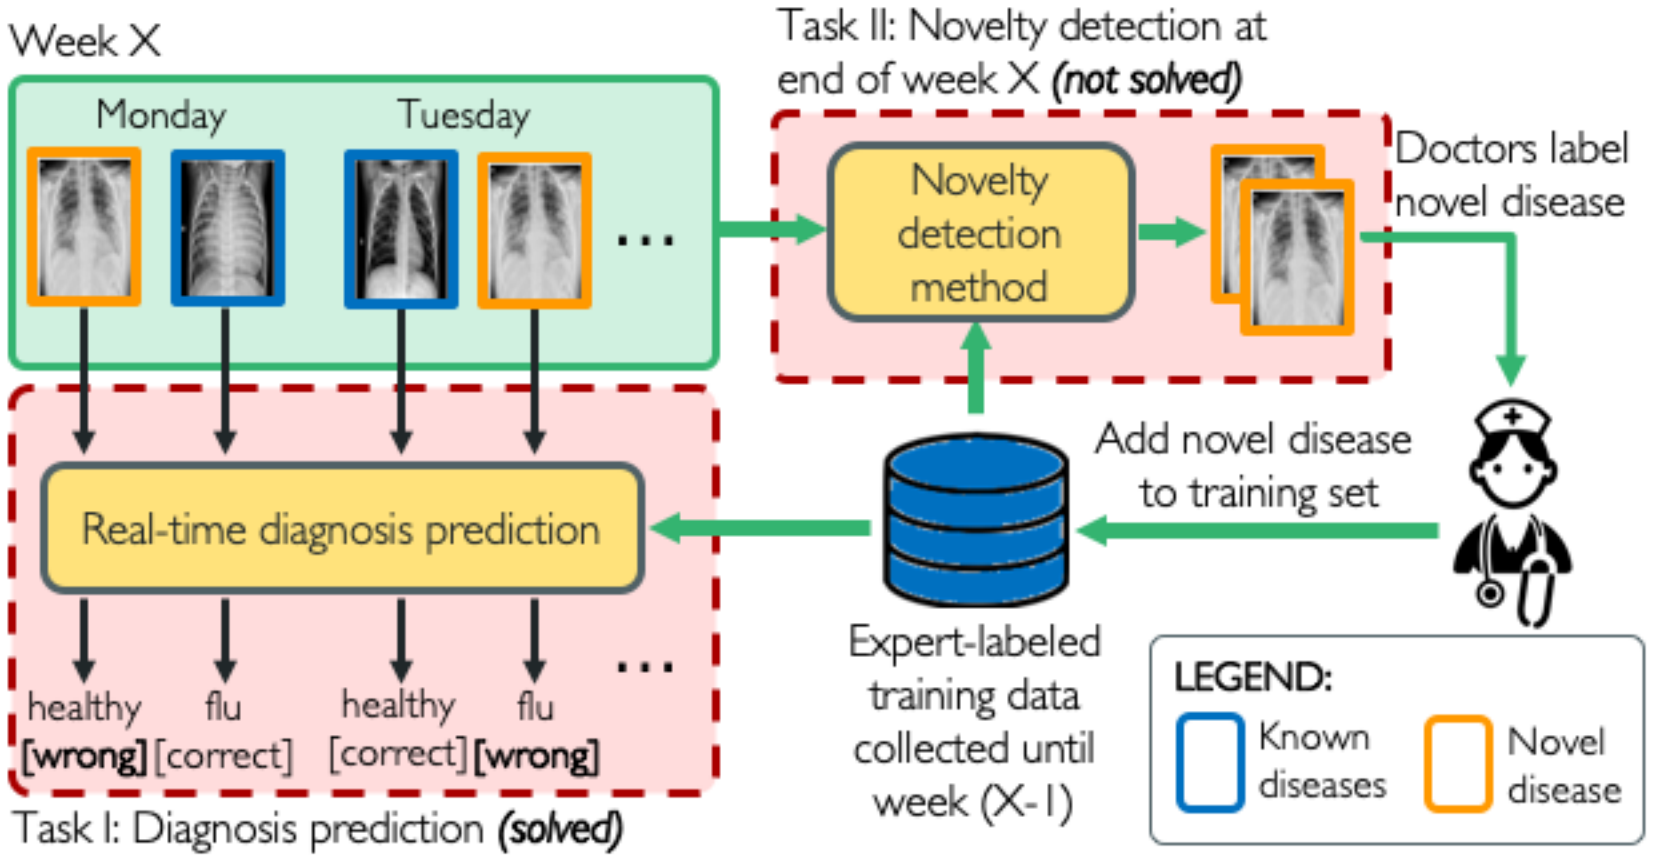

Supplement: supplementary_material [file attachment]

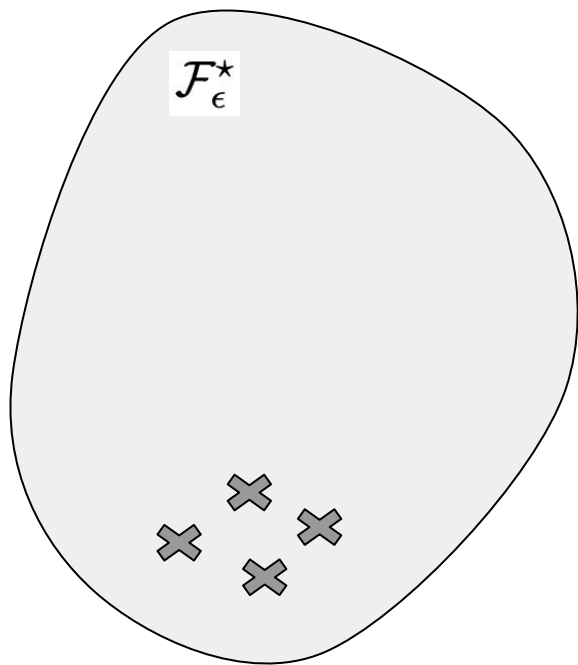

Models in vanilla ensemble

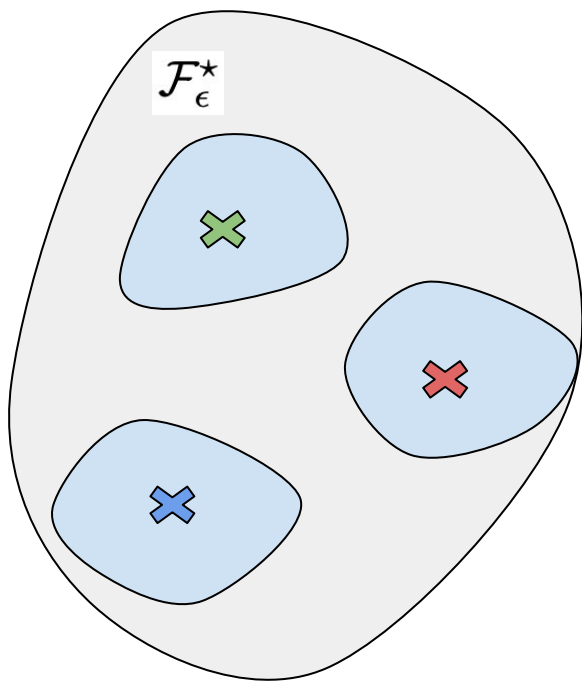

Models in RETO ensemble

Supplement: supplementary_material [file attachment]

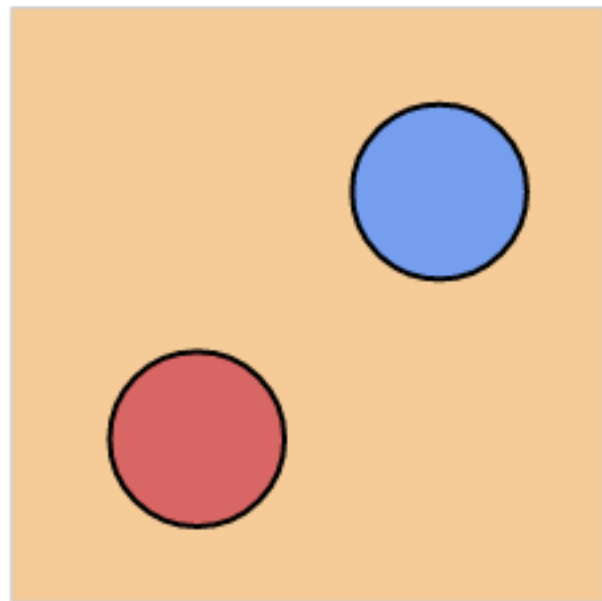

$X_{\text{ID}}$  and  $X_{\text{OOD}}$

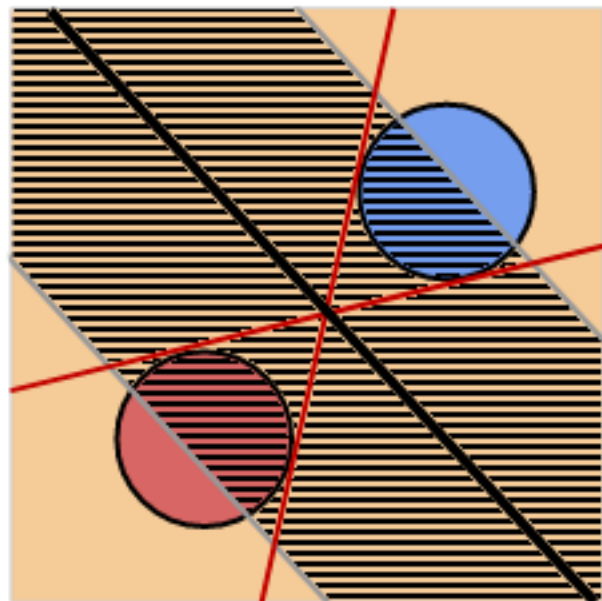

$(H \circ \text{Avg})$

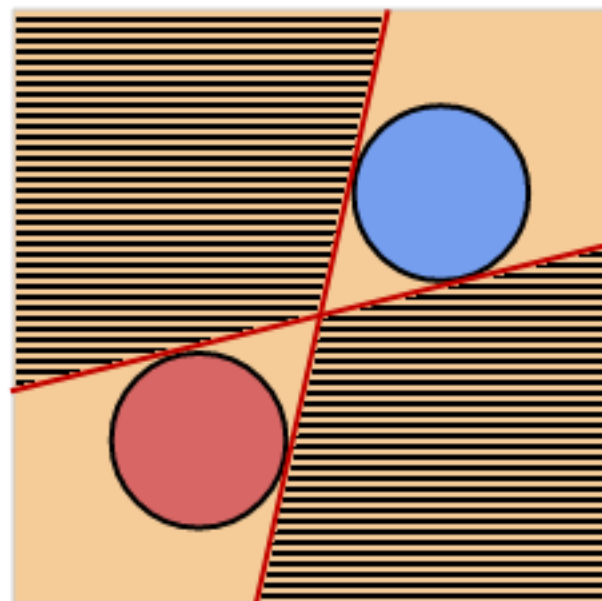

$(\text{Avg} \circ p)$

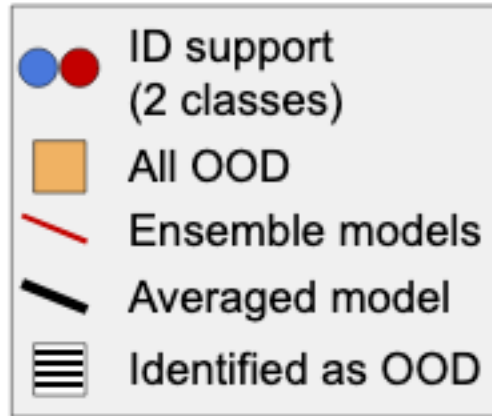

Supplement: supplementary_material [file attachment]

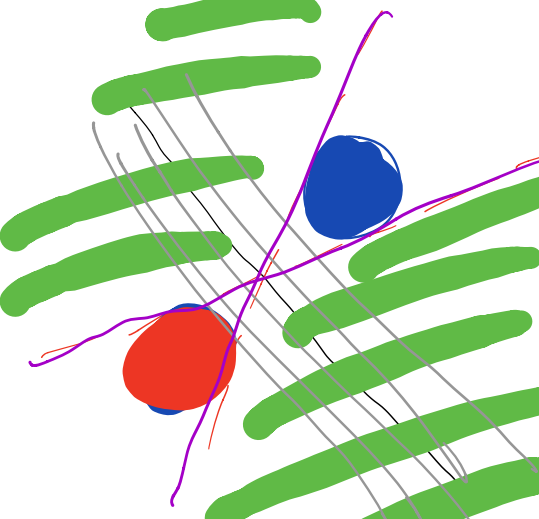

Supplement: supplementary_material [file attachment]

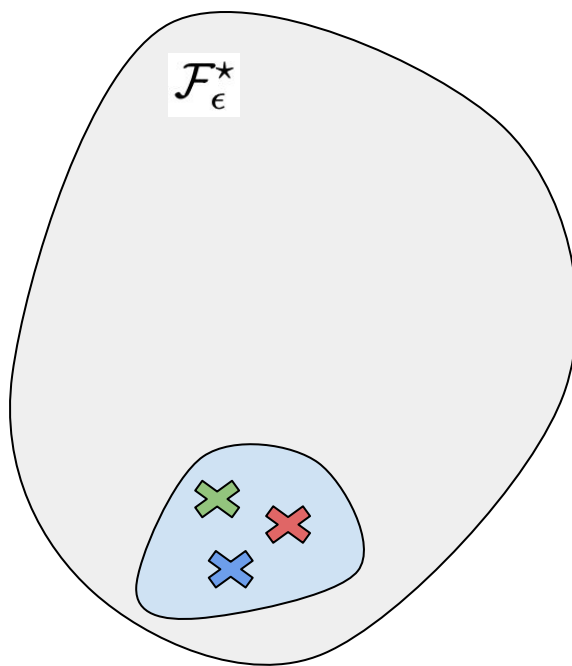

Models in vanilla ensemble

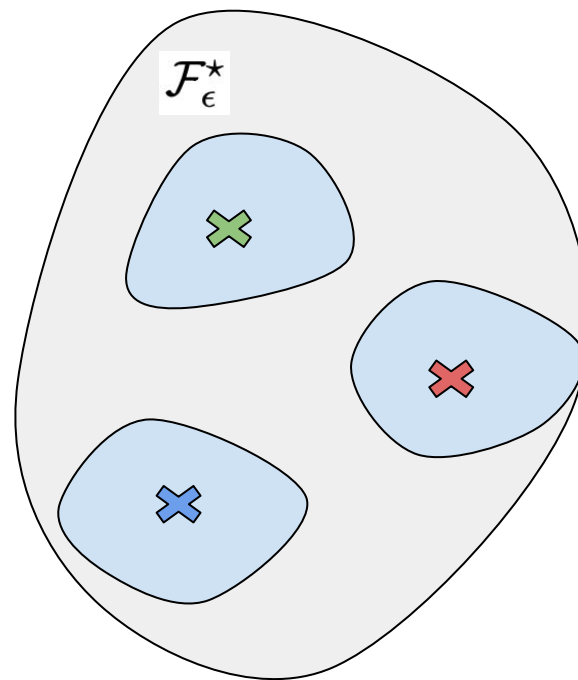

Models in RETO ensemble

Supplement: supplementary_material [file attachment]

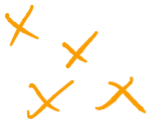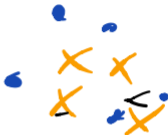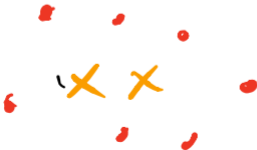

Supplement: supplementary_material [file attachment]

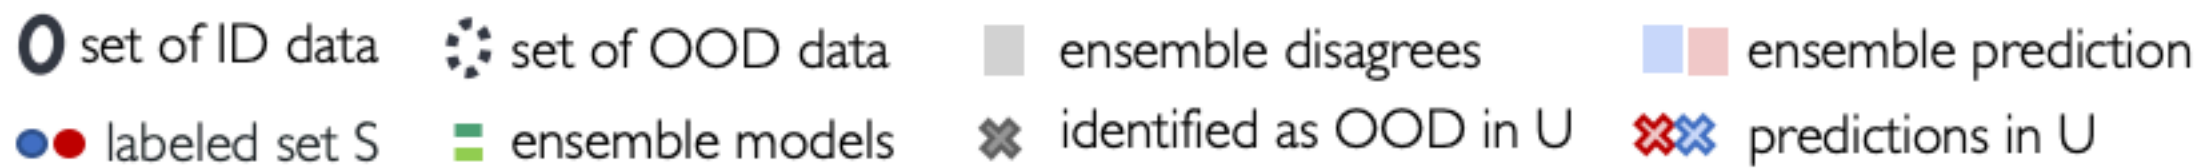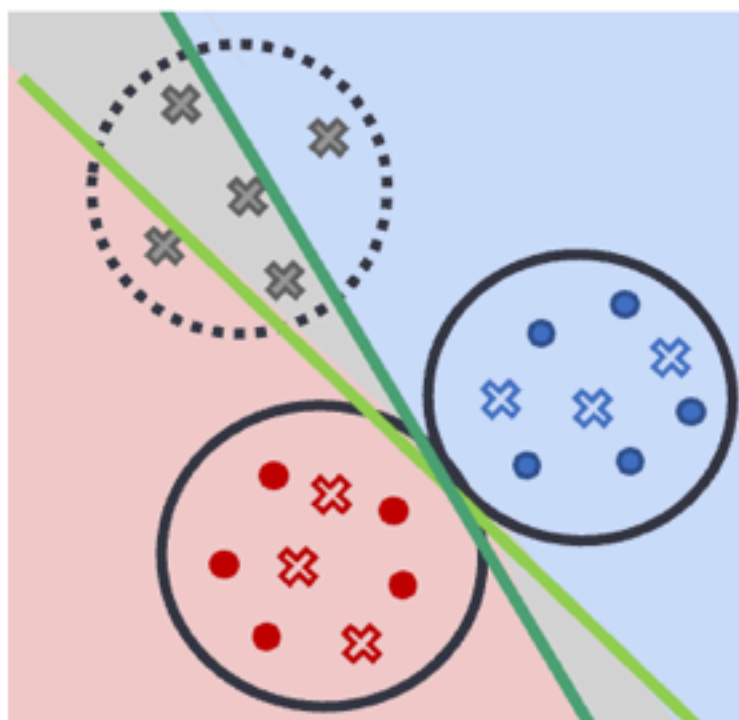

a) Too little disagreement

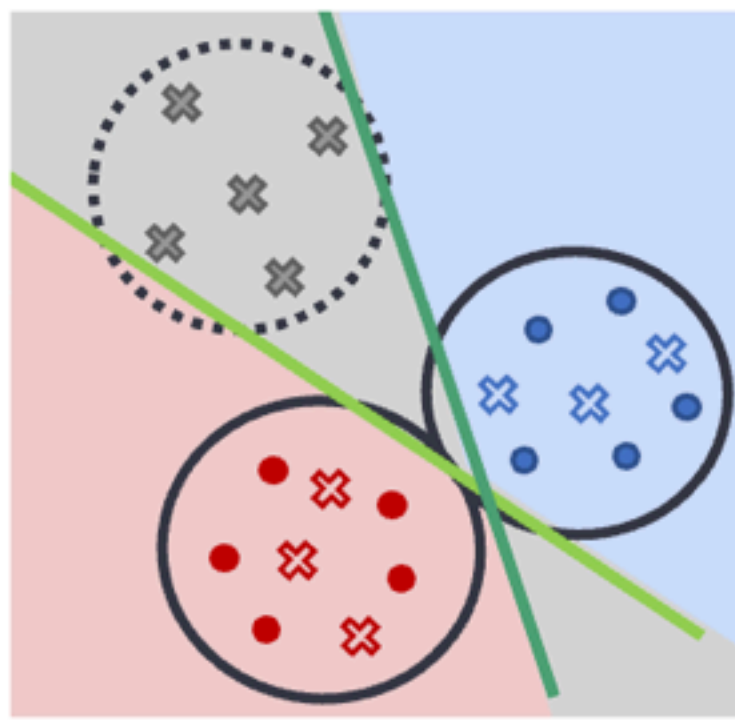

b) Just enough disagreement

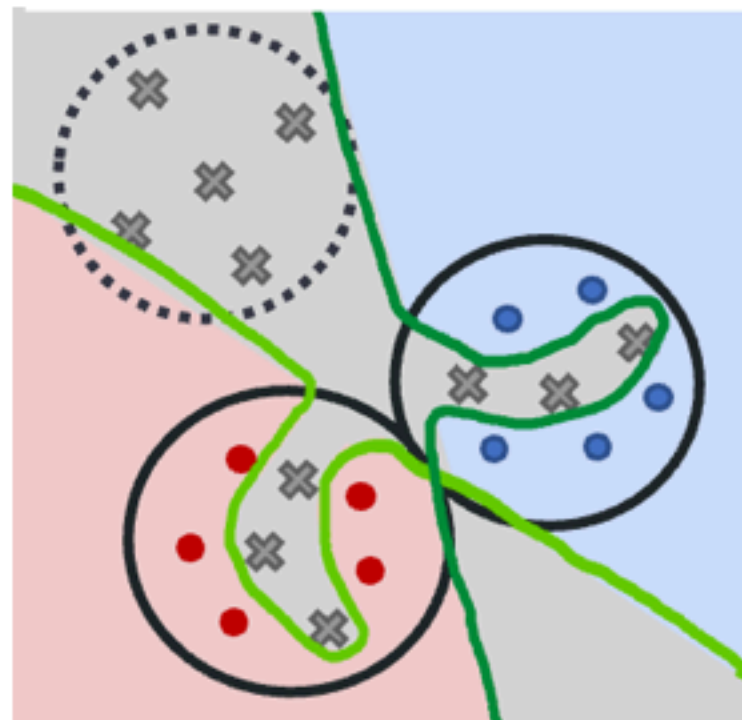

c) Too much disagreement

Supplement: supplementary_material [file attachment]

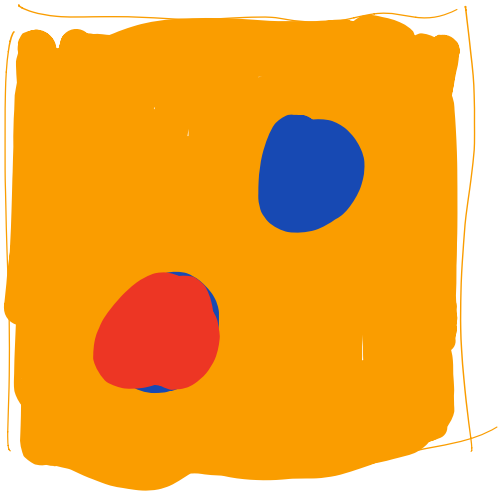

Supplement: supplementary_material [file attachment]

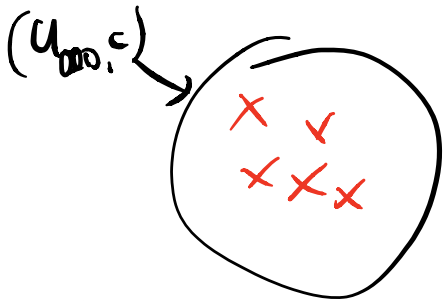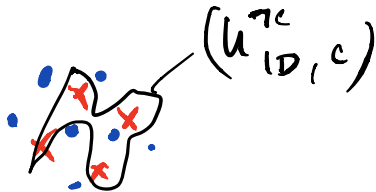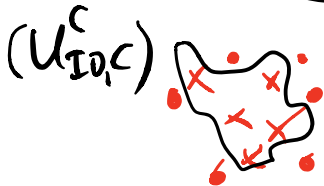

● Labeled  $S$   
x Unlabeled  $U$   
x  $c$ -labeled  $U$

Supplement: supplementary_material [file attachment]
